## CASE REPORTS

a normal redox state and the potential futility of overly exuberant attempts at hyperresuscitation.

## References

1. Barton R, Cerra FB: The hypermetabolism multiple organ failure syndrome. *Chest* 96:1153-1160, 1989
2. Bihari D, Smithies M, Gimson A, Tinker J: The effects of vasodilation with prostacyclin on oxygen delivery and uptake in critically ill patients. *N Engl J Med* 397-403, 1987
3. Gutierrez G, Pohl RJ: Oxygen consumption is linearly related to O<sub>2</sub> supply in critically ill patients. *J Crit Care* 1:45-53, 1986
4. Astiz ME, Rackow EC, Falk JL, Kaufman BS, Weil MH: Oxygen delivery and consumption in patients with hyperdynamic septic shock. *Crit Care Med* 15:26-28, 1987
5. Mizock BA, Falk JL: Lactic acidosis in critical illness. *Crit Care Med* 20:80-92, 1992
6. Tuschmidt J, Oblitas D, Fried JC: Oxygen consumption in sepsis and septic shock. *Crit Care Med* 19:664-671, 1991
7. Bone RC: Abnormal cellular metabolism in sepsis: A new interpretation. *JAMA* 267:1518-1519, 1992
8. Hayes MA, Yau EHS, Timmins AC, Hinds CJ, Earnest HS, Watson D: Response of critically ill patients to treatment aimed at achieving supranormal oxygen delivery and consumption: Relationship to outcome. *Chest* 103:886-895, 1993
9. Hotchkiss RS, Karl IE: Reevaluation of the role of cellular hypoxia and bioenergetic failure in sepsis. *JAMA* 263:1503-1510, 1992
10. Cerra FB, Caprioli J, Siegel JH, McMenamy RR, Border JR: Proline metabolism in sepsis, cirrhosis and general surgery. *Ann Surg* 190:577-586, 1979
11. Grum CM, Simon RH, Dantzker DR, Fox IH: Evidence for adenosinetriphosphate degradation in critically ill patients. *Chest* 88:763-767, 1985
12. Luft D, Deichsel G, Schmulling R-M, Stein W, Eggstein M: Definition of clinically relevant lactic acidosis in patients with internal diseases. *J Clin Pathol* 80:484-489, 1983
13. Almenoff PL, Leavy J, Weil MH, Goldberg NB, Vega D, Rackow EC: Prolongation of the half-life of lactate after maximal exercise in patients with hepatic dysfunction. *Crit Care Med* 17:870-873, 1989
14. Kruse JA, Zaidi SAJ, Carlson RW: Significance of blood lactate levels in critically ill patients with liver disease. *Am J Med* 83:77-82, 1987
15. Driscoll DF, Bistrian BR, Jenkins RL, Randall S, Dzik WH, Gerson B, Blackburn GL: Development of metabolic alkalosis after massive transfusion during orthotopic liver transplantation. *Crit Care Med* 15:905-908, 1987
16. Collins JA, Knudson MM: Metabolic effects of massive transfusion, *Principles of Transfusion Medicine*. Edited by Rossi EC, Simon TL, Moss GS. Baltimore, Williams & Wilkins, 1991, pp 419-422
17. Vincent J-L, Roman A, DeBacker D, Kahn RJ: Oxygen uptake/supply dependency: Effects of short-term dobutamine infusion. *Am Rev Respir Dis* 142:2-7, 1990
18. Terradellas JB, Bellot JF, Saris AB, Gil CL, Torrallardona AT, Garriga JR: Acute and transient ST segment elevation during bacterial shock in seven patients without apparent heart disease. *Chest* 81:444-448, 1982
19. Weil MH, Afifi AA: Experimental and clinical studies on lactate and pyruvate as indicators of the severity of acute circulatory failure (shock). *Circulation* 41:989-1001, 1970

Anesthesiology  
80:216-219, 1994  
© 1994 American Society of Anesthesiologists, Inc.  
J. B. Lippincott Company, Philadelphia

## Postanesthetic Apnea in Full-term Infants after Pyloromyotomy

Dean B. Andropoulos, M.D., Maurine B. Heard, M.D., Kristen L. Johnson, M.D.,  
Jonathan T. Clarke, M.D., Richard W. Rowe, M.D.

POSTANESTHETIC apnea in the former premature infant less than 60 weeks postconceptional age is a well described phenomenon, with specific strategies recommended for its prevention, monitoring, and treat-

ment.<sup>1-6</sup> Apnea has been described in four full-term infants after anesthesia for a variety of surgical procedures.<sup>7-10</sup> We report four cases of apnea after anesthesia for pyloromyotomy for full-term infants without perinatal problems.

Patient characteristics, preoperative laboratory values, and details of the anesthetic techniques are presented in table 1.

### Case Reports

#### Case 1

This infant appeared mildly dehydrated, and after 2 h of rehydration consisting of normal saline 20 ml/kg, he was taken to the operating

Received from the Department of Anesthesiology, Children's Hospital Oakland, Oakland, California. Accepted for publication August 27, 1993.

Address reprint requests to Dr. Andropoulos: Department of Anesthesiology, Children's Hospital Oakland, 747 52nd Street, Oakland, California 94609-1809.

Key words: Anesthesia, pediatric: newborn surgery. Complications: apnea. Surgery: pyloromyotomy.

## CASE REPORTS

room. Upon arrival in the postanesthesia care unit (PACU), rectal temperature was 37.2° C. In the first 15 min the patient had two episodes of apnea, each lasting 15–20 s. They were detected by direct observation by the PACU nurse.

Hemoglobin oxygen saturation, measured *via* pulse oximeter ( $Sp_{O_2}$ ), decreased from 99% to 93% while the infant breathed 3 l/min nasal cannula oxygen, but his heart rate remained at 140–150 beats/min. Both apneic episodes were terminated using tactile stimulation. After 2.5 h observation in the PACU with no further apnea, the patient was monitored on the ward with an apnea–bradycardia monitor. He was discharged home 36 h after surgery without further apnea.

#### Case 2

In the operating room, shortly after extubation, this infant had two brief episodes of apnea (each 5–10 s), without change in heart rate, that resolved spontaneously. The infant's rectal temperature was 35.8° C at the time of admission to the PACU. Fifteen minutes later the patient had a single apneic episode lasting 15 s without a decrease in  $Sp_{O_2}$  while breathing 8 l/min oxygen by face mask. This episode was detected by direct observation by the PACU nurse. Heart rate remained unchanged at 125 beats/min, and the episode was terminated by tactile stimulation. After 2 h of observation in PACU, the patient was transferred to the pediatric intensive care unit for apnea–bradycardia monitoring. He was discharged home 48 h after surgery without further episodes of apnea or bradycardia.

#### Case 3

This patient presented to the emergency department appearing slightly dehydrated. After administration of lactated Ringer's solution 20 ml/kg and rehydration for 14 h, the patient was taken to the operating room. Forty-five minutes after uncomplicated induction of anesthesia, the  $Sp_{O_2}$  decreased to 77% briefly (less than 30 s). Because of lack of adequate breath sounds and poor chest excursion with manual ventilation, the trachea was reintubated. Because of the possibility of bronchospasm, the patient was given six breaths of metaproterenol with a metered-dose inhaler *via* the tracheal tube. Breath sounds were clear after the reintubation. He had no subsequent intraoperative problems, and the trachea was extubated in the operating room. A chest radiograph in the PACU was normal, and after 1 h the infant was discharged to the ward with apnea–bradycardia and pulse oximeter monitoring.

Seven hours after surgery the apnea–bradycardia alarm sounded. The patient had received no opioids and had been observed by the nurse to be awake and crying 8 min previously. The infant was noted to take two gasping respirations 10 s apart and then became apneic and pulseless. The patient required tracheal intubation, 8 min of external cardiac compressions, three doses intravenous (iv) epinephrine, and two doses iv sodium bicarbonate. Arterial blood gas values 15 min after resuscitation were pH 7.23, carbon dioxide tension 28 mmHg, oxygen tension 563 mmHg, and base deficit 15 mEq/l, and serum glucose was 129 mg/dl. The patient had a generalized seizure shortly after the arrest and received a loading dose of iv phenobarbital. The lungs were mechanically ventilated for 3 days because of depression in consciousness level with hypoventilation, presumably resulting from the hypoxic central nervous system insult and phenobarbital. The infant recovered full neurologic function by the time of discharge.

The bedside nurse had assessed the infant 1 h before the cardiorespiratory arrest and had noted clear breath sounds on bilateral auscultation and a respiratory rate of 44 breaths/min with no distress. At no time during or after cardiorespiratory arrest was bronchospasm noted. Seven days after surgery the patient had a 20-s apneic spell, with bradycardia and cyanosis, that was terminated by tactile stimulation. Phenobarbital had been the only medication for 96 h. Other diagnostic procedures during the hospital stay revealed two normal electroencephalograms, normal 12-lead electrocardiogram, and no cardiac arrhythmias noted over 7 days of monitoring. Cerebral computed tomographic scan 1 day after the resuscitation revealed only mild cerebral edema, and cerebral magnetic resonance imaging scan 10 days later was normal. Polysomnography 9 days after surgery revealed no apnea or bradycardia but an abnormal response to 17% inspired oxygen challenge, with  $Sp_{O_2}$  decreasing to 85% and onset of periodic breathing with respiratory pauses up to 6 s. The patient was discharged home 11 days after the operation with a home apnea–bradycardia monitor.

#### Case 4

Upon transfer to our hospital, the patient was moderately dehydrated. She had experienced three brief episodes of apnea, each lasting less than 15 s, with bradycardia to 100 beats/min. Cerebral computed tomographic scan, obtained because of a history of lethargy and a full anterior fontanel, was normal. After the patient received iv fluid therapy for 10 h, the infant's lethargy and dehydration had resolved, and she was taken to the operating room. The patient was given caffeine citrate 10 mg/kg iv because of the preoperative apnea.

One hour after surgery, two episodes of apnea with heart rate decreasing to 100 beats/min occurred. They were detected by direct observation by the PACU nurse. The episodes were 15 s in duration with  $Sp_{O_2}$  decreasing from 100% to 90%, and both episodes were terminated by tactile stimulation of the patient. The infant was transferred to the pediatric intensive care unit 2 h after surgery and was given an additional 10 mg/kg caffeine citrate iv at that time. She had no further episodes of apnea. The Pediatric Pulmonary Service was consulted and ascribed the preoperative apnea spells to the dehydration and metabolic alkalosis (see below). The postoperative apnea was believed clearly to have been associated with the anesthetic. Because of the self-limited nature of the apnea and the patient's young gestational age, a polysomnogram was not done. The patient was discharged home 4 days after the operation.

## Discussion

There have been only four reported cases of postanesthetic apnea in a full-term infant.<sup>7–10</sup> The ages of the patients ranged from 1 to 40 days, and surgical procedures consisted of cataract extraction, inguinal herniorrhaphy, bladder exstrophy repair, and cystoscopy with drainage of imperforate hymen. None of these infants had a history of apnea or intraoperative complications that might have predisposed them to apnea. The apneic episodes occurred 45 min to 6 h after anesthesia. On examination by polysomnogram one infant demonstrated multiple brief episodes of apnea with

CASE REPORTS

Table 1. Clinical Data and Anesthetic Techniques

|                                               | Patient                             |                                            |                                   |                                   |
|-----------------------------------------------|-------------------------------------|--------------------------------------------|-----------------------------------|-----------------------------------|
|                                               | 1                                   | 2                                          | 3                                 | 4                                 |
| Age (days)                                    | 34                                  | 19                                         | 11                                | 19                                |
| Postconceptional age (weeks)                  | 42                                  | 43                                         | 42                                | 43                                |
| Weight (kg)                                   | 3.9                                 | 3.6                                        | 4.3                               | 3.8                               |
| Preoperative                                  | 138                                 | 137                                        | 153                               | 149                               |
| Na <sup>+</sup> (mEq/l)                       |                                     |                                            |                                   |                                   |
| K <sup>+</sup> (mEq/l)                        | 5.8                                 | 5.9                                        | 4.7                               | 5.3                               |
| Cl <sup>-</sup> (mEq/l)                       | 105                                 | 101                                        | 110                               | 104                               |
| CO <sub>2</sub> (mEq/l)                       | 23                                  | 19                                         | 21                                | 30                                |
| Hemoglobin (g/dl)                             | 11.6                                | 16.9                                       | 16.4                              | 14.1                              |
| Glucose (mg/dl)                               | NA                                  | 76                                         | 101                               | 122                               |
| Anesthetic agents                             | A, T, sux, N <sub>2</sub> O, hal, P | A, T, sux, N <sub>2</sub> O, hal, bupiv, V | A, T, sux, hal, V                 | A, T, sux, iso, V                 |
| Fluids (ml)                                   | D51/3 NS 135, 15 25% albumin        | D51/3 NS 90                                | D2.51/2 NS 120                    | D2.51/2 NS 190                    |
| Estimated blood loss (ml)                     | 5                                   | 2                                          | 10                                | 5                                 |
| Neuromuscular blockade reversal drugs (μg/kg) | Neostigmine 80, atropine 25         | Neostigmine 80, glycopyrrolate 16          | Neostigmine 70, glycopyrrolate 14 | Neostigmine 70, glycopyrrolate 14 |
| Train-of-four monitoring                      | Yes                                 | Yes                                        | Yes                               | Yes                               |
| Anesthetic time                               | 1 h, 20 min                         | 1 h, 10 min                                | 1 h, 15 min                       | 1 h, 50 min                       |
| Surgical time                                 | 55 min                              | 50 min                                     | 45 min                            | 1 h, 5 min                        |
| Time of apnea, postoperative                  | 15 min (×2)                         | 15 min                                     | 7 h                               | 1 h                               |

Na<sup>+</sup> = serum sodium concentration; K<sup>+</sup> = serum potassium concentration; Cl<sup>-</sup> = serum chloride concentration; CO<sub>2</sub> = serum carbon dioxide concentration; A = atropine; T = thiopental; sux = succinylcholine; N<sub>2</sub>O = nitrous oxide; hal = halothane; P = pancuronium; bupiv = 0.25% bupivacaine infiltration to wound; V = vecuronium; iso = isoflurane; D51/3 NS = 5% dextrose in one third normal saline; D2.51/2 NS = 2.5% dextrose in one half normal saline.

desaturation that resolved after treatment with theophylline. Three of the four infants were scheduled for outpatient surgery.

The possibility of apnea immediately after pyloromyotomy has been described<sup>11,12</sup>; however, no cases have been reported in the anesthesia or surgical literature. Our patients all were full-term and experienced apnea 15 min to 7 h after anesthesia. We ruled out other factors commonly contributing to apneic spells in young infants: anemia (by hemoglobin measurement and minimal surgical blood loss); hypothermia (one infant did have a rectal temperature of 35.8° C, but this is within normal limits in full-term infants)<sup>13</sup>; hypoglycemia (by measurement of serum glucose or because of the rather large amounts of glucose administered); sepsis (by clinical course); or central nervous system abnormalities (by cerebral imaging or neurologic examination).<sup>14</sup> All patients had documented reversal of neuromuscular blockade by train-of-four monitoring, and none had received opioids. All patients' tracheas were extubated when they were fully awake. Several of these infants did receive generous amounts of iv fluid and glucose, but no infant had signs

of respiratory distress from possible fluid overload in the postoperative period. Patient 3 did have an episode of inadequate ventilation during surgery, either due to bronchospasm or bronchial intubation, but this was not believed to be a contributing factor in his life-threatening apneic episode. Patient 4 did have several preoperative episodes of apnea and bradycardia, but she was the only patient with a hypochloremic metabolic alkalosis. (See below.)

There are several possible mechanisms for the apnea seen in these patients. First, the repeated vomiting associated with pyloric stenosis often leads to a hypochloremic metabolic alkalosis.<sup>15</sup> Cerebrospinal fluid pH, which is one of the determinants of respiratory drive,<sup>16</sup> may still be elevated after correction of serum electrolytes. However, only one of the four patients exhibited this electrolyte pattern, and she did have preoperative apneic spells. Second, subanesthetic concentrations of volatile agents depress hypoxic ventilatory drive in adult volunteers.<sup>17</sup> This may have played a role in the early postoperative apnea seen in these patients, although it is unlikely to have contributed in patients 3 and 4. Third, it is possible that diagnosis of

Downloaded from http://aas2.silverchair.com/anesthesiology/article-pdf/80/1/216/3272330000542-199401000-00031.pdf by guest on 10 April 2024

## CASE REPORTS

the duration of the apneic spells in patients 1, 2, and 4 was inaccurate.<sup>18</sup> No hard copies of the respiratory channel on the apnea-bradycardia monitor were obtained. The duration of the apnea may have been overestimated, and thus the episodes may actually have been within what would be considered normal limits for this gestational age. A small percentage of normal full-term infants of 42–43 weeks' postconceptional age may have very infrequent respiratory pauses of 12–18 s.<sup>19–23</sup> In addition, patients 1 and 2 did not suffer cyanosis or bradycardia. (Both were receiving supplemental oxygen.) However, the apneic spells in patients 1, 2, and 4 were terminated by tactile stimulation to prevent severe cyanosis and bradycardia. It is impossible to speculate about exactly how long the apnea in these cases would have lasted without intervention. Much more disturbing is the case of the infant who developed severe apnea, bradycardia, and cardiac arrest 7 h after the operation. A thorough search revealed no precipitating causes other than general anesthesia.

Further study is required to define better the effect of general anesthesia on the incidence and severity of apnea in this patient population. Until such information is available, no firm recommendations can be made about postoperative apnea monitoring in young full-term infants. However, we believe that permanent neurologic injury and possibly death were prevented in patient 3 by the apnea-bradycardia monitor. Despite the well known limitations of the use of apnea monitors with small infants,<sup>24</sup> we believe that consideration should be given to short-term apnea monitoring in young full-term infants who undergo general anesthesia.

## References

1. Steward DJ: Preterm infants are more prone to complications following minor surgery than are term infants. *ANESTHESIOLOGY* 56:304–306, 1982
2. Liu LM, Cote CJ, Goudsouzian NG, Ryan JF, Firestone S, Dedrick DF, Liu PL, Todres ID: Life-threatening apnea in infants recovering from anesthesia. *ANESTHESIOLOGY* 59:506–510, 1983
3. Welborn LG, Ramirez N, Oh TH, Ruttimann UE, Fink R, Guzzetta P, Epstein BS: Postanesthetic apnea and periodic breathing in infants. *ANESTHESIOLOGY* 65:658–661, 1986
4. Kurth CD, Spitzer AR, Broennle AM, Downes JJ: Postoperative apnea in preterm infants. *ANESTHESIOLOGY* 66:483–488, 1987
5. Welborn LG, Hannallah RS, Fink R, Ruttimann UE, Hicks JM: High-dose caffeine suppresses postoperative apnea in former preterm infants. *ANESTHESIOLOGY* 71:347–349, 1989
6. Welborn LG, Rice IJ, Hannallah RS, Broadman LM, Ruttimann UE, Fink R: Postoperative apnea in former preterm infants: Prospective comparison of spinal and general anesthesia. *ANESTHESIOLOGY* 72:838–842, 1990
7. Tetzlaff JE, Annand DW, Pudimat MA, Nicodemus HF: Postoperative apnea in a full-term infant. *ANESTHESIOLOGY* 69:426–428, 1988
8. Noseworthy J, Duran C, Khine HH: Postoperative apnea in a full-term infant. *ANESTHESIOLOGY* 70:879–880, 1989
9. Cote CJ, Kelley DH: Postoperative apnea in a full-term infant with a demonstrable respiratory pattern abnormality. *ANESTHESIOLOGY* 72:559–561, 1990
10. Karayan J, LaCoste L, Fuscicardi J: Postoperative apnea in a full-term infant (letter). *ANESTHESIOLOGY* 75:375, 1991
11. Marcy JH, Cook DR: Common surgical conditions of the newborn. *Neonatal Anesthesia*. Edited by Cook DR, Marcy JH. Pasadena, Appleton Davies, 1988, pp 159–188
12. Spear RM, Deshpande JK, Davis PJ: Anesthesia for general, urologic, and plastic surgery, *Smith's Anesthesia for Infants and Children*. Edited by Motyama EA, Davis PJ. St. Louis, CV Mosby, 1990, pp 591–610
13. Fanaroff AA, Martin RJ: Routine and special care. *Neonatal perinatal Medicine: Diseases of the Fetus and Infant*. Edited by Fanaroff AA, Martin RJ. St. Louis, CV Mosby, 1987, pp 393–444
14. Hansen T, Corbet A: Control of breathing, *Diseases of the Newborn*. Edited by Taeusch HW, Ballard RA, Avery ME. Philadelphia, WB Saunders, 1991, pp 470–474
15. Shandling B: Pyloric stenosis, *Nelson's Textbook of Pediatrics*. Edited by Behrman RE. Philadelphia, WB Saunders, 1992, pp 948–950
16. Nunn JF: Chemical control of breathing, *Applied Respiratory Physiology*. Edited by Nunn JF. London, Butterworths, 1987, pp 79–91
17. Paylin EG, Su JY: Cardiopulmonary pharmacology, *Anesthesia*. Edited by Miller RD. New York, Churchill Livingstone, 1990, pp 105–134
18. Muttitt SC, Finer NN, Tierney AJ, Rossmann J: Neonatal apnea: Diagnosis by nurse versus computer. *Pediatrics* 82:713–720, 1988
19. Stein IM, White A, Kennedy JL, Merisalo RL, Chernoff H, Gould JB: Apnea recordings of healthy infants at 40, 44, and 52 weeks postconception. *Pediatrics* 63:724–730, 1979
20. Richards JM, Alexander JR, Shinebourne EA, de Sweet M, Wilson AJ, Southall DP: Sequential 22-hour profiles of breathing patterns and heart rate in 110 full-term infants during their first 6 months of life. *Pediatrics* 74:763–777, 1984
21. Kelly DH, Stellwagen LM, Kaitz E, Shannon DC: Apnea and periodic breathing in normal full-term infants during the first twelve months. *Pediatr Pulmonol* 1:215–219, 1985
22. Albani M, Bentele KHP, Budde C, Schulte FJ: Infant sleep apnea profile: Preterm vs. term infants. *Eur J Pediatr* 143:261–268, 1985
23. Stebbins VA, Poets CF, Alexander JA, Arrowsmith WA, Southall DP: Oxygen saturation and breathing patterns in infancy: I. Full term infants in the second month of life. *Arch Dis Child* 66:569–573, 1991
24. MacFadyen UM, Borthwick G, Simpson H, McKay M, Neilson J: Monitoring for central apnoea in infancy: Limitations of single channel recordings. *Arch Dis Child* 63:282–287, 1988
